# Supplementary material for: The Related Mechanisms Predicted through Network-Based Pharmacological Analysis and the Anti-Inflammatory Effects of Fraxinus rhynchophylla Hance Bark on Contact Dermatitis in Mice
Source: MDPI journal article supplement (doi:10.3390/ijms24076091), 2023-03-23
Supplement: s1 [file s1]

## Supplementary data 2.

CD was induced by DNFB in Balb/c mice as previously described (Yang et al., 2019). Briefly, mice were sensitized with 30  $\mu$ l of DNFB (0.2%, v/v) in acetone: olive oil (AOO, 4:1) onto both ears for three consecutive days. After four days of sensitization, the dorsum of all mice were shaved. On day 8, each mouse was challenged with 60  $\mu$ l of DNFB (0.1% v/v) in AOO onto the shaved dorsum every two days (four times applications in total).

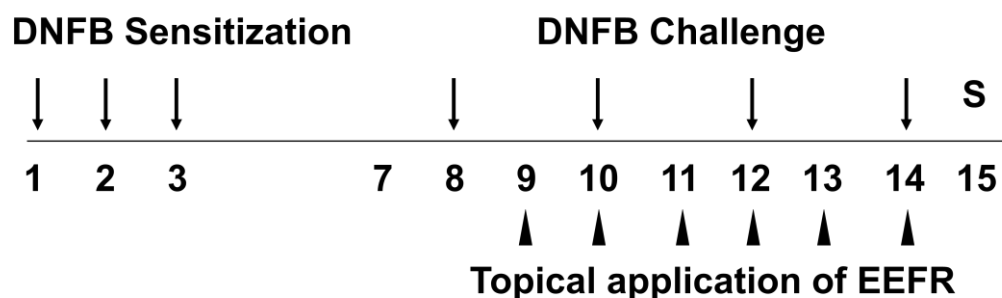

**Figure S1.** Experimental schedule. DNFB was applied onto the surface of each ear for sensitization on days 1, 2 and 3. Challenging was conducted using 0.1% of DNFB on days 8, 10, 12 and 14. EEFR and dexamethasone were topically applied for 6 consecutive days. All animals were sacrificed on day 15. EEFR, 70% ethanol extract of *F. rhynchophylla* bark; DNFB, 1-fluoro-2,4-dinitrobenzene; S, sacrifice.

## Reference

Yang, B., Kim, S., Kim, J.H., Lim, C., Kim, H., Cho, S., 2019. Gentiana scabra Bunge roots alleviates skin lesions of contact dermatitis in mice. J. Ethnopharmacol. 233, 141-147.
