# Supplementary material for: The Related Mechanisms Predicted through Network-Based Pharmacological Analysis and the Anti-Inflammatory Effects of Fraxinus rhynchophylla Hance Bark on Contact Dermatitis in Mice
Source: MDPI journal article supplement (doi:10.3390/ijms24076091), 2023-03-23
Supplement: s1 [file s1]

## Supplementary data

**Table S1. Total compounds of *F. rhynchophylla***

| No. | Compound name                                                                                                                                                                                          | PubChem<br>CID | Molecular<br>weight | OB<br>(%) | DL   |
|-----|--------------------------------------------------------------------------------------------------------------------------------------------------------------------------------------------------------|----------------|---------------------|-----------|------|
| 1   | (2S,3R,4S,5S,6R)-2-[4-<br>[(3R,3aS,6S,6aR)-3a-hydroxy-6-(4-<br>hydroxy-3-methoxyphenyl)-3,4,6,6a-<br>tetrahydro-1H-furo[3,4-c]furan-3-yl]-<br>2-methoxyphenoxy]-6-<br>(hydroxymethyl)oxane-3,4,5-triol | 14756314       | 536.5               | 28.54     | 0.86 |
| 2   | 2,6-Dimethoxy-1,4-benzoquinone<br>(DMBQ)                                                                                                                                                               | 68262          | 168.15              | 12.00     | 0.04 |
| 3   | 8-Hydroxypinoresinol                                                                                                                                                                                   | 3010930        | 374.40              | 92.43     | 0.55 |
| 4   | Beta-sitosterol                                                                                                                                                                                        | 222284         | 414.70              | 36.91     | 0.75 |
| 5   | Caffeic acid                                                                                                                                                                                           | 689043         | 180.16              | 25.76     | 0.05 |
| 6   | Esculetin                                                                                                                                                                                              | 5281416        | 178.14              | 22.97     | 0.07 |
| 7   | Esculin                                                                                                                                                                                                | 5281417        | 340.28              | 20.43     | 0.36 |
| 8   | Fraxetin                                                                                                                                                                                               | 5273569        | 208.17              | 23.04     | 0.09 |
| 9   | Fraxin                                                                                                                                                                                                 | 5273568        | 370.31              | 36.76     | 0.42 |
| 10  | Melissic acid                                                                                                                                                                                          | 10471          | 452.80              | 13.22     | 0.49 |
| 11  | Nonox D                                                                                                                                                                                                | 8679           | 219.28              | 39.82     | 0.13 |
| 12  | Osmanthuside H                                                                                                                                                                                         | 192437         | 432.40              | 8.89      | 0.57 |
| 13  | Scopoletol                                                                                                                                                                                             | 5280460        | 192.17              | 27.77     | 0.08 |
| 14  | Sinapaldehyde                                                                                                                                                                                          | 5280802        | 208.21              | 63.16     | 0.07 |
| 15  | Sinapaldehyde glucoside                                                                                                                                                                                | 25791064       | 370.40              | 20.91     | 0.33 |
| 16  | Sinapyl alcohol                                                                                                                                                                                        | 5280507        | 210.23              | 10.23     | 0.07 |
| 17  | Sitogluside                                                                                                                                                                                            | 5742590        | 576.80              | 20.63     | 0.62 |
| 18  | Syrigin                                                                                                                                                                                                | 5316860        | 372.40              | 14.64     | 0.32 |
| 19  | Syringaldehyde                                                                                                                                                                                         | 8655           | 182.17              | 67.06     | 0.05 |
| 20  | Tyrosol                                                                                                                                                                                                | 10393          | 138.16              | 33.81     | 0.02 |
| 21  | Ursolic acid                                                                                                                                                                                           | 64945          | 456.70              | 16.77     | 0.75 |
