# Supplementary material for: The Related Mechanisms Predicted through Network-Based Pharmacological Analysis and the Anti-Inflammatory Effects of Fraxinus rhynchophylla Hance Bark on Contact Dermatitis in Mice
Source: MDPI journal article supplement (doi:10.3390/ijms24076091), 2023-03-23
Supplement: s1 [file s1]

The following primer sets were used:

TNF- $\alpha$ :

F, 5'-CTCTCATCAGTTCTATGGCC-3'

R, 5'-TTGAAGAGAACCTGGGAGTA-3';

IL-1 $\beta$ :

F: 5'-CAGGCAGTATCACTCATTGT-3'

R: 5'-CCAGCAGGTTATCATCATCA-3'

IL-6:

F, 5'-GCCAGAGTCCTTCAGAGAGA-3'

R, 5'-GGTCTTGGTCCTTAGCCACT-3'

IL-8:

F, 5'-CATCCAGAGCTTGAGTGTGA-3'

R, 5'-GTTAGCCTTGCCTTTGTTCA-3'.

COX-2:

F, 5'-CATGGGTGTGAAGGGAAATA-3'

R, 5'-CGCAGTTTATGTTGTCTGTC-3'

GAPDH:

F, 5'-GATGACATCAAGAAGGTGGT-3'

R, 5'-TACCAGGAAATGAGCTTGAC-3'
