# Supplementary material for: The Related Mechanisms Predicted through Network-Based Pharmacological Analysis and the Anti-Inflammatory Effects of Fraxinus rhynchophylla Hance Bark on Contact Dermatitis in Mice
Source: Int J Mol Sci. 2023 Mar 23;24(7):6091. doi: 10.3390/ijms24076091 (PMC10094049; doi:10.3390/ijms24076091)
Supplement: Supplementary file 1 [file ijms-24-06091-s001.zip]

Archive with 7 entries (7 files):
- ijms-2263352-supplementary/Supplementary Materials S1.pdf
- ijms-2263352-supplementary/Supplementary Materials S2.pdf
- ijms-2263352-supplementary/Supplementary Materials S3.pdf
- ijms-2263352-supplementary/Supplementary Materials S4.pdf
- ijms-2263352-supplementary/Supplementary Materials S5.pdf
- ijms-2263352-supplementary/Supplementary Materials S6.pdf
- ijms-2263352-supplementary/Supplementary Materials S7.pdf
